# Supplementary material for: The metabonomic study of Shaoyao-Gancao decoction in a rat model of acute bronchial asthma by1H NMR
Source: Royal Society of Chemistry journal article supplement (doi:10.1039/c5ay01701g), 2015-12-08
Supplement: c5ay01701g2.pdf [file c5ay01701g2.pdf]

1 **Supplementary Table 1.** <sup>1</sup>H NMR data for metabolites in rat plasma and urine

| Keys | Metabolites       | Moieties                                                                        | $\delta^1\text{H}$ (multiplicity)       | Samples |
|------|-------------------|---------------------------------------------------------------------------------|-----------------------------------------|---------|
| 1    | Lipid             | $\text{CH}_3(\text{CH}_2)_n, \text{CH}_3\text{CH}_2\text{CH}_2\text{C}=\text{}$ | 0.86(t), 0.88(t)                        | P       |
|      |                   | $(\text{CH}_2)_n, \text{CH}_2\text{C}=\text{O}, -\text{CH}=\text{CH}-$          | 1.27(m), 2.0(m), 5.30(m)                |         |
| 2    | Leucine           | $\alpha\text{CH}, \beta\text{CH}_2, \gamma\text{CH}$                            | 3.72(t), 1.71(m), 1.72(m)               | P       |
|      |                   | $\delta\text{CH}_3, \delta\text{CH}_3'$                                         | 0.95(dd), 0.96(dd)                      |         |
| 3    | Isoleucine        | $\alpha\text{CH}, \beta\text{CH}, \beta\text{CH}_3'$                            | 3.67(d), 1.99(m), 1.01(d)               | P       |
|      |                   | $\gamma\text{CH}_2, \gamma\text{CH}_2', \delta\text{CH}_3$                      | 1.25(m), 1.46(m), 0.94(t)               |         |
| 4    | Valine            | $\alpha\text{CH}, \beta\text{CH}, \gamma\text{CH}_3, \gamma\text{CH}_3'$        | 3.61(d), 2.30(m), 1.05(d),<br>0.99(d)   | P,U     |
|      |                   |                                                                                 |                                         |         |
| 5    | Lactate           | $\alpha\text{CH}, \beta\text{CH}_3$                                             | 4.12(q), 1.33(d)                        | P,U     |
| 6    | Ether             | $\text{CH}_2, \text{CH}_3$                                                      | 3.66(q), 1.18(t)                        | P       |
| 7    | 3-Hydroxybutyrate | $\alpha\text{CH}_2, \alpha\text{CH}_2', \beta\text{CH}, \gamma\text{CH}_3$      | 2.32(dd), 2.41(dd),<br>4.16(m), 1.21(d) | P       |
|      |                   |                                                                                 |                                         |         |

|    |                       |                                                                                    |                                       |     |
|----|-----------------------|------------------------------------------------------------------------------------|---------------------------------------|-----|
| 8  | Alanine               | $\alpha\text{CH}$ , $\beta\text{CH}_3$                                             | 3.78(q), 1.48(d)                      | P,U |
| 9  | Arginine              | $\alpha\text{CH}$ , $\beta\text{CH}_2$ , $\gamma\text{CH}_2$ , $\delta\text{CH}_2$ | 3.74(t), 1.89(m), 1.68(m),<br>3.23(t) | P   |
| 10 | Acetate               | $\text{CH}_3$                                                                      | 1.93(s)                               | P,U |
| 11 | N-acetyl-glycoprotein | $\text{CH}_3$                                                                      | 2.05(s)                               | P,U |
| 12 | O-acetyl-glycoprotein | $\text{CH}_3$                                                                      | 2.14(s)                               | P   |
| 13 | Pyruvate              | $\text{CH}_3$                                                                      | 2.38(s)                               | P,U |
| 14 | Glutamate             | $\alpha\text{CH}$ , $\beta\text{CH}_2$ , $\gamma\text{CH}_2$                       | 3.75(m), 2.08(m), 2.36(m)             | P   |
| 15 | Glutamine             | $\alpha\text{CH}$ , $\beta\text{CH}_2$ , $\gamma\text{CH}_2$                       | 3.77(m), 2.18(m), 2.45(m)             | P   |
| 16 | Citrate               | $\text{CH}_2$ , $\text{CH}_2'$                                                     | 2.72(d), 2.54(d)                      | P,U |
| 17 | Methionine            | $\alpha\text{CH}$ , $\beta\text{CH}_2$ , $\gamma\text{CH}_2$ , S- $\text{CH}_3$    | 3.84(t), 2.12(m), 2.54(t),<br>2.10(s) | P   |
| 18 | 2-Oxoglutarate        | $\beta\text{CH}_2$ , $\gamma\text{CH}_2$                                           | 2.46(t), 3.03(t)                      | P,U |
| 19 | Dimethylglycine       | $\text{CH}_3$ , $\text{CH}_2$                                                      | 2.92(s), 3.71(s)                      | P,U |
| 20 | Creatine              | $\text{CH}_3$ , $\text{CH}_2$                                                      | 3.04(s), 3.92(s)                      | P,U |

|    |                        |                                                              |                                         |     |
|----|------------------------|--------------------------------------------------------------|-----------------------------------------|-----|
| 21 | Asparagine             | $\alpha\text{CH}$ , $\beta\text{CH}_2$ , $\beta\text{CH}_2'$ | 3.97(m), 2.83(dd),<br>2.94(dd)          | P   |
| 22 | Acetone                | $\text{CH}_3$                                                | 2.24(s)                                 | P   |
| 23 | Acetoacetate           | $\text{CH}_3$                                                | 2.28(s)                                 | U   |
| 24 | DMSO <sub>2</sub>      | $\text{CH}_3$                                                | 3.17(s)                                 | U   |
| 25 | Choline                | $\alpha\text{CH}_2$ , $\beta\text{CH}_2$ , N- $\text{CH}_3$  | 4.07(t), 3.53(t), 3.21(s)               | P   |
| 26 | O-phosphocholine       | $\alpha\text{CH}_2$ , $\beta\text{CH}_2$ , N- $\text{CH}_3$  | 4.22(t), 3.60(t), 3.21(s)               | P   |
| 27 | Trimethylamine N-oxide | N- $\text{CH}_3$                                             | 3.23(s)                                 | P   |
| 28 | Betaine                | $\text{CH}_2$ , N- $\text{CH}_3$                             | 3.25(s), 3.94(s)                        | P,U |
| 29 | Glycerol               | $\text{CH}_2$                                                | 3.56(dd)                                | P,U |
| 30 | Glycine                | $\text{CH}_2$                                                | 3.58(s)                                 | P,U |
| 31 | $\beta$ -Glucose       | 1-CH, 2-CH, 3-CH, 4-CH<br>5-CH, 6-CH, 6-CH'                  | 4.66(d), 3.27(dd), 3.48(t),<br>3.42(dd) | P,U |
|    |                        |                                                              | 3.47(m), 3.72(dd),<br>3.90(dd)          |     |
|    |                        |                                                              |                                         |     |

|    |                   |                                         |                                                           |     |
|----|-------------------|-----------------------------------------|-----------------------------------------------------------|-----|
| 32 | $\alpha$ -Glucose | 1-CH, 2-CH, 3-CH<br>4-CH, 5-CH, 6-CH    | 5.24(d), 3.54(dd), 3.72(dd)<br>3.42(dd), 3.84(m), 3.78(m) | P,U |
| 33 | Taurine           | CH <sub>2</sub> ,CH <sub>2</sub> '      | 3.43(t), 3.26(t)                                          | U   |
| 34 | Uracil            | 5-CH, 6-CH                              | 5.81(d), 7.55(d)                                          | U   |
| 35 | Xanthosine        | 2-CH, 2'-CH<br>3-CH, 4-CH               | 7.88(s), 5.85(d)<br>4.72(m), 4.41(m)                      | P   |
| 36 | Hippurate         | 2,6-CH, 3,5-CH<br>4-CH, CH <sub>2</sub> | 7.53(d),7.62(m)<br>7.82(m), 3.98(d)                       | P,U |
| 37 | Fumarate          | CH                                      | 6.53(s)                                                   | P,U |
| 38 | Tyrosine          | 2,6-CH, 3,5-CH                          | 7.19(d), 6.89(d)                                          | P,U |
| 39 | Histidine         | 2-CH, 4-CH                              | 7.86(s), 7.04(s)                                          | P,U |
| 40 | Phenylalanine     | 2,6-CH,3,5-CH, 4-CH                     | 7.33(m), 7.42(m), 7.36(m)                                 | P   |
| 41 | Formate           | CH                                      | 8.47(s)                                                   | P,U |
| 42 | Xanthine          | CH                                      | 7.82(s)                                                   | P   |
| 43 | Cytidine          | 2-CH, 3-CH                              | 7.85(s), 6.08(s)                                          | P,U |

|    |                  |                                     |                           |   |
|----|------------------|-------------------------------------|---------------------------|---|
| 44 | Hypoxanthine     | 2-CH, 7-CH                          | 8.22(s), 8.20(s)          | U |
| 45 | Tyramine         | CH, CH'                             | 7.22(dd), 6.88(dd)        | U |
|    |                  | CH <sub>2</sub> , CH <sub>2</sub> ' | 3.21(t), 2.91(t)          |   |
| 46 | Succinate        | CH <sub>2</sub>                     | 2.42(s)                   | U |
| 47 | Cis-Aconitate    | CH, CH <sub>2</sub>                 | 5.71(s), 3.15(s)          | U |
| 48 | Urea             | CH <sub>2</sub>                     | 5.82(s)                   | U |
| 49 | Allantion        | CH                                  | 5.39(s)                   | U |
| 50 | Indoxyl sulfate  | 4-CH, 5-CH, 6-CH                    | 7.50(m), 7.21(m), 7.29(m) | U |
|    |                  | 7-CH, CH <sub>3</sub>               | 7.71(m), 7.38(s)          |   |
| 51 | Bile acids       | CH <sub>3</sub>                     | 0.73(s)                   | U |
| 52 | DMSO             | CH <sub>3</sub>                     | 2.73(s)                   | U |
| 53 | Methanol         | CH <sub>3</sub>                     | 3.36(s)                   | U |
| 54 | Hydroquinone     | CH                                  | 6.80(s)                   | U |
| 55 | Dimethylamine    | CH <sub>3</sub>                     | 2.74(s)                   | U |
| 56 | Dihydroxyacetone | CH <sub>3</sub>                     | 4.46(s)                   | U |

|    |                        |                                                               |                                               |   |
|----|------------------------|---------------------------------------------------------------|-----------------------------------------------|---|
| 57 | Malate                 | CH, CH <sub>2</sub> , CH <sub>2</sub> '                       | 4.31(dd), 2.38(m), 2.65(m)                    | U |
| 58 | Butyrate               | αCH <sub>2</sub> , βCH <sub>2</sub> , γCH <sub>3</sub>        | 2.15(t), 1.56(m), 0.92(t)                     | U |
| 59 | Carnitine              | αCH <sub>2</sub> , βCH, γCH <sub>2</sub><br>N-CH <sub>3</sub> | 2.40(m), 4.56(m), 3.41(m)<br>3.25(s)          | U |
| 60 | Phenylacetylglycine    | CH <sub>2</sub> , CH <sub>2</sub> , 2,6-CH,<br>3,5-CH, 4-CH   | 3.69(s), 3.77(s), 7.34(m)<br>7.41(m), 7.36(m) | U |
| 61 | 2-Oxobutyrate          | CH <sub>2</sub> , CH <sub>3</sub>                             | 2.75(q), 1.05(t)                              | U |
| 62 | Ethanol                | CH <sub>3</sub> , CH <sub>2</sub>                             | 1.19(t), 3.67(q)                              | U |
| 63 | Ethylmalonate          | CH, CH <sub>2</sub> , CH <sub>3</sub>                         | 2.99(t), 1.71(m), 0.89(t)                     | U |
| 64 | Isovaleryglycine       | CH, CH <sub>2</sub> , CH <sub>3</sub>                         | 1.94(m), 2.02(d), 0.93(d)                     | U |
| 65 | 3-Methyl-2-oxovalerate | βCH, βCH <sub>3</sub> , γCH, δCH <sub>3</sub>                 | 2.92(m), 1.46(m), 1.68(m),<br>1.10(d)         | U |
| 66 | 2-Ketoisovalerate      | CH, CH <sub>3</sub>                                           | 3.03(m), 1.13(d)                              | U |
| 67 | Methylmalonate         | CH, CH <sub>3</sub>                                           | 3.17(q), 1.25(d)                              | U |
| 68 | 3-Hydroxyisovalerate   | CH, CH <sub>3</sub>                                           | 2.36(s), 1.27(s)                              | U |

|    |                   |                                                    |                           |     |
|----|-------------------|----------------------------------------------------|---------------------------|-----|
| 69 | Threonine         | $\alpha$ CH, $\beta$ CH, $\gamma$ CH <sub>3</sub>  | 3.59(d), 4.25(m), 1.32(d) | U   |
| 70 | N-Acetylglutamate | $\alpha$ CH, $\beta$ CH <sub>2</sub>               | 4.13(m), 1.86(m)          | U   |
|    |                   | $\beta$ CH <sub>2</sub> , $\gamma$ CH <sub>2</sub> | 2.02(m), 2.23(m)          |     |
| 71 | Creatinine        | CH <sub>3</sub> , CH <sub>2</sub>                  | 3.05(s), 4.07(s)          | P,U |
| 72 | Trimethylamine    | N-CH <sub>3</sub>                                  | 2.88(s)                   | U   |
| 73 | Trigonelline      | 2-CH, 4-CH, 5-CH                                   | 9.14(s), 8.85(m), 8.09(m) | U   |
|    |                   | 6-CH, CH <sub>3</sub>                              | 8.85(m), 4.43(s)          |     |
| 74 | Benzoate          | 2,6-CH, 3,5-CH, 4-CH                               | 7.87(d), 7.49(d), 7.57(t) | U   |

2 Note: s, singlet; d, doublet; t, quartet; m, multiplet; dd, doublet of doublets; P, plasma; U, urine

3
