# Supplementary figures and images for: The metabonomic study of Shaoyao-Gancao decoction in a rat model of acute bronchial asthma by1H NMR
Source: Royal Society of Chemistry journal article supplement (doi:10.1039/c5ay01701g), 2015-12-08

Supplementary Fig. 1

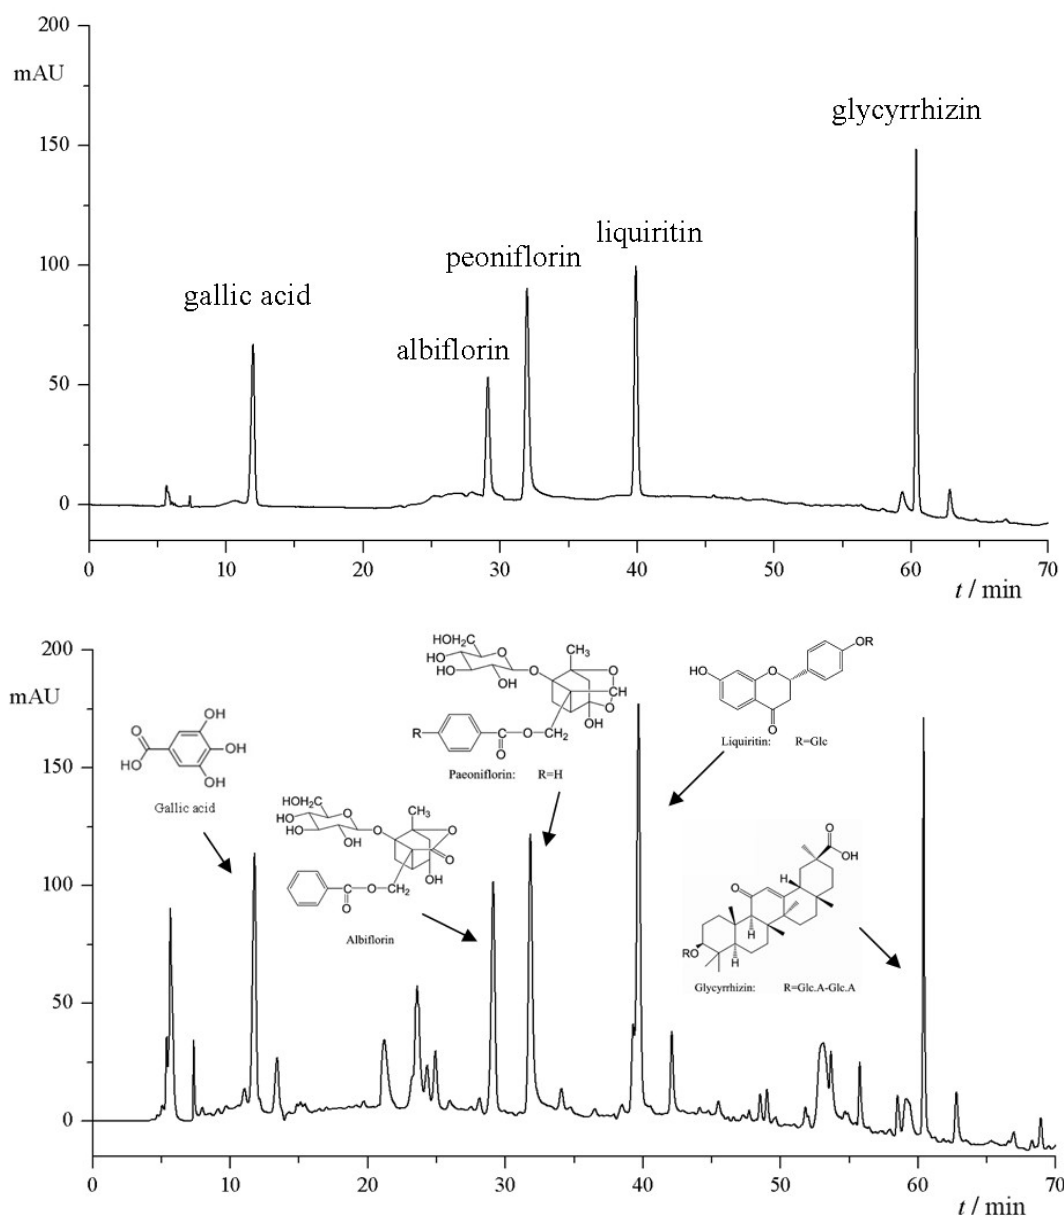

Supplement: c5ay01701g1.pdf [file c5ay01701g1.pdf]
